# Supplementary material for: The chemiluminescence based Ziplex® automated workstation focus array reproduces ovarian cancer Affymetrix GeneChip® expression profiles
Source: J Transl Med. 2009 Jul 6;7:55. doi: 10.1186/1479-5876-7-55 (PMC2724495; doi:10.1186/1479-5876-7-55)
Supplement: Additional file 4 — Signal intensities and 3'/5' ratios for all ten 5' control probes on duplicate chips. 3', 5' signial intensities and 3'/5' ratios for each sample, for the genes RPL4, POL2RA, ACTB, GAPD and ACADVL2. [file 1479-5876-7-55-S4.xls]

## Sheet: Tonin_3pr-5pr-ratios
Additional File 4: Signal intensities and 3’/5’ ratios for all ten 5’ control probes on duplicate chips
Codifed Sample Number	3' and 5' signal intensities for RPL4					3' and 5' signal intensities for POLR2A					3' and 5' signal intensities for ACTB					3' and 5' signal intensities for GAPD					3' and 5' signal intensities for ACADVL 2
	3'	5'	3'/5'	5'	3'/5'	3'	5'	3'/5'	5'	3'/5'	3'	5'	3'/5'	5'	3'/5'	3'	5'	3'/5'	5'	3'/5'	3'	5'	3'/5'	5'	3'/5'
MG0001	4066.7	10.6	383.65	12.2	333.34	100.1	332.6	0.3	8.3	12.06	989.7	11.1	89.16	32	30.93	1900	39.3	48.35	39.6	47.98	332	9.8	33.88	9	36.89
MG0002	3500	865	4.05	699	5.01	164.4	94.7	1.74	24.3	6.77	4666.7	874.8	5.33	2533.3	1.84	10566.7	4100	2.58	2800	3.77	334.9	8	41.86	34.3	9.76
MG0003	3533.3	826.9	4.27	654.6	5.4	190.1	104.6	1.82	13.7	13.88	2266.7	389.4	5.82	1193.7	1.9	6133.3	1885.5	3.25	1274.1	4.81	197.2	11.2	17.61	23.2	8.5
MG0004	3566.7	1149.8	3.1	941.5	3.79	277.6	127.9	2.17	14	19.83	1800	367.5	4.9	1321.9	1.36	4400	1646.6	2.67	1092.2	4.03	164.2	18.7	8.78	21.7	7.57
MG0005	3066.7	833.7	3.68	753.8	4.07	196.3	101.2	1.94	42	4.67	3033.3	661	4.59	1633.3	1.86	6700	2533.3	2.64	1966.7	3.41	296.6	8.9	33.33	27.3	10.86
MG0006	2966.7	823.3	3.6	753.4	3.94	224.8	73.7	3.05	15.3	14.69	5100	1280	3.98	3633.3	1.4	8066.7	3366.7	2.4	2566.7	3.14	272.3	5.4	50.43	24.7	11.02
MG0007	2366.7	619.3	3.82	492.7	4.8	225	103.6	2.17	61.3	3.67	3166.7	609.7	5.19	1324.6	2.39	5266.7	1933.3	2.72	1353.6	3.89	219.9	6	36.65	19.6	11.22
MG0008	2366.7	689.7	3.43	590.8	4.01	163.4	90.4	1.81	18.3	8.93	4733.3	1123.9	4.21	3333.3	1.42	6866.7	3366.7	2.04	2566.7	2.68	232.8	9.8	23.76	25.5	9.13
MG0009	2566.7	740.4	3.47	609.7	4.21	267.2	76.3	3.5	54.5	4.9	2833.3	552.6	5.13	1506.2	1.88	8200	4133.3	1.98	2966.7	2.76	320.8	11.7	27.42	35	9.17
MG0010	4066.7	1095.2	3.71	944.9	4.3	169.7	85.9	1.98	23.6	7.19	4300	942.2	4.56	3700	1.16	8266.7	4000	2.07	2966.7	2.79	274.2	16.5	16.62	33.3	8.23
MG0011	5100	321.6	15.86	285.3	17.88	144.8	96.1	1.51	25.3	5.72	5000	306.3	16.32	1117.5	4.47	8966.7	2033.3	4.41	1600	5.6	316.3	9.1	34.76	18.8	16.82
MG0012	2633.3	753.4	3.5	564.7	4.66	228.6	155.7	1.47	45.9	4.98	3300	866.6	3.81	2100	1.57	6800	2966.7	2.29	2066.7	3.29	367.5	8.4	43.75	35.4	10.38
MG0014	2866.7	568.7	5.04	500.7	5.73	211	140	1.51	18.2	11.59	5366.7	699.7	7.67	3700	1.45	12000	4866.7	2.47	3533.3	3.4	491.8	24.1	20.41	41	12
MG0015	3433.3	868	3.96	724.3	4.74	243.8	93.4	2.61	35	6.97	4133.3	530.3	7.79	1783.2	2.32	9433.3	3166.7	2.98	2433.3	3.88	322	8	40.25	27.5	11.71
MG0016	4100	804.6	5.1	661	6.2	215.5	86.6	2.49	54.8	3.93	6033.3	686.5	8.79	3433.3	1.76	9433.3	4200	2.25	2733.3	3.45	247.6	18	13.76	23.4	10.58
MG0017	5033.3	475.2	10.59	431.7	11.66	111.3	219.2	0.51	6.5	17.12	2133.3	141.1	15.12	546	3.91	6200	973.6	6.37	875.5	7.08	312.4	10.7	29.2	17.2	18.16
MG0018	4866.7	326.3	14.91	334.5	14.55	134.3	235.8	0.57	14.8	9.07	2391.4	86.7	27.58	460.2	5.2	6633.3	686.2	9.67	427.7	15.51	216.8	22.2	9.77	10.4	20.85
MG0019	2533.3	424.2	5.97	436.9	5.8	158.3	191.8	0.83	11.4	13.89	1468.8	187.4	7.84	555.5	2.64	7633.3	2200	3.47	1604	4.76	193.5	6.6	29.32	16.3	11.87
MG0020	2733.3	718.5	3.8	568.1	4.81	154.2	188.7	0.82	4.7	32.81	756.6	233.8	3.24	427.6	1.77	4633.3	1477	3.14	1133.6	4.09	211.8	8.4	25.21	17.2	12.31
MG0021	4066.7	673.5	6.04	568.3	7.16	114.7	148.5	0.77	6.2	18.5	2000	176.3	11.34	792.3	2.52	5066.7	1340.6	3.78	980	5.17	172.8	14.3	12.08	16.2	10.67
MG0022	4233.3	338.7	12.5	440.4	9.61	248.7	211.8	1.17	7.1	35.03	1933.3	100.2	19.29	568.5	3.4	7900	1636.6	4.83	1340.8	5.89	148.5	19.4	7.65	13.9	10.68
MG0023	4666.7	1152.7	4.05	938.7	4.97	101.8	132.9	0.77	9.5	10.72	2266.7	238.7	9.5	734.1	3.09	7700	2866.7	2.69	2033.3	3.79	174.6	6.1	28.62	18.4	9.49
MG0024	3766.7	986.6	3.82	791.9	4.76	132.2	143.4	0.92	10.3	12.83	2269.2	462.6	4.91	897	2.53	6733.3	2533.3	2.66	1800	3.74	234.4	5.3	44.23	22.5	10.42
MG0025	3700	232.4	15.92	210	17.62	123.4	223.2	0.55	8.5	14.52	2900	122.2	23.73	408.5	7.1	7500	1492.9	5.02	1155.7	6.49	252.5	13	19.42	15.9	15.88
MG0026	3533.3	383.2	9.22	341.8	10.34	159.7	164.8	0.97	5.8	27.53	1806.4	154.6	11.68	785.5	2.3	6433.3	1273.4	5.05	916.9	7.02	236.4	28.7	8.24	18.1	13.06
MG0027	6900	1576.3	4.38	1343.8	5.13	205.4	158	1.3	8	25.68	1490.4	197.2	7.56	871.6	1.71	5200	1525.7	3.41	1105	4.71	287.3	22.5	12.77	26.8	10.72
MG0028	3666.7	504.7	7.27	456.7	8.03	128.9	106.9	1.21	6	21.48	1647.1	184.4	8.93	663.7	2.48	4833.3	1518	3.18	945.3	5.11	230.3	8.4	27.42	19	12.12
